1

2 **Odd skipped-related 1 (Osr1) identifies muscle-interstitial fibro-adipogenic**  
3 **progenitors (FAPs) activated by acute injury.**

4

5 Jürgen Stumm<sup>1,#</sup>, Pedro Vallecillo Garcia<sup>1,#</sup>, Sophie vom Hofe-Schneider<sup>1</sup>, David Ollitrault<sup>2,3</sup>, Heinrich  
6 Schrewe<sup>4</sup>, Aris N. Economides<sup>5</sup>, Giovanna Marazzi<sup>2,3</sup>, David A. Sassoon<sup>2,3</sup>, Sigmar Stricker<sup>1,\*</sup>

7

8 <sup>1</sup>Institute for Chemistry and Biochemistry, Freie Universität Berlin, 14195 Berlin, Germany

9 <sup>2</sup>Stem Cells and Regenerative Medicine, ICAN-UMRS 1166, Université de Pierre et Marie Curie,  
10 Sorbonne Universités, 75013 Paris, France

11 <sup>3</sup>ICAN, Institute of Cardiometabolism and Nutrition, 75013 Paris, France

12 <sup>4</sup>Department of Developmental Genetics, Max Planck Institute for Molecular Genetics, 14195 Berlin,  
13 Germany

14 <sup>5</sup>Regeneron Pharmaceuticals, Tarrytown, NY 10591, USA

15

16 <sup>#</sup>These authors contributed equally to this work

17 <sup>\*</sup> Author for correspondence ([sigmar.stricker@fu-berlin.de](mailto:sigmar.stricker@fu-berlin.de))

18

19 **Running title:** Osr1 marks injury-activated FAPs

20 **Keywords:** skeletal muscle; fibro-adipogenic progenitors; mesenchymal progenitors, muscle

21 interstitium; muscle regeneration

22

23 **Summary statement:** Expression of Osr1 specifically in muscle interstitial fibro-adipogenic

24 progenitors (FAPs) activated by acute injury provides a tool to isolate and trace this population.

25

26

27 **Abstract**

28 Fibro-adipogenic progenitors (FAPs) are resident mesenchymal progenitors in adult skeletal muscle  
29 that support muscle repair, but also give rise to fibrous and adipose infiltration in response to disease  
30 and chronic injury. FAPs are currently identified using cell surface markers that do not distinguish  
31 between quiescent FAPs and FAPs actively engaged in the regenerative process. We have shown  
32 previously that FAPs are derived from cells that express the transcription factor Osr1 during  
33 development. Here we show that adult FAPs express Osr1 at low levels and frequency, however  
34 upon acute injury FAPs reactivate Osr1 expression in the injured tissue. Osr1<sup>+</sup> FAPs are enriched in  
35 proliferating and apoptotic cells demonstrating that Osr1 identifies activated FAPs. *In vivo* genetic  
36 lineage tracing shows that Osr1<sup>+</sup> activated FAPs return to the resident FAP pool after regeneration as  
37 well as contribute to adipocytes after glycerol-induced fatty degeneration. In conclusion, reporter  
38 LacZ or eGFP-CreERT2 expression from the endogenous Osr1 locus serves as marker for FACS  
39 isolation and tamoxifen-induced manipulation of activated FAPs.

## 40 Introduction

41 The remarkable regenerative potential of skeletal muscle relies on myogenic stem cells (satellite  
42 cells), however other interstitial populations play a critical supportive role (Bentzinger et al., 2013;  
43 Pannerec et al., 2012; Uezumi et al., 2014b). Amongst these, fibro-adipogenic progenitors (FAPs)  
44 have attracted immense attention in the past years. FAPs are muscle-interstitial resident  
45 mesenchymal progenitor cells that have the capacity to provide a pro-myogenic environment for  
46 muscle regeneration (Joe et al., 2010) but also contribute directly to fibrotic degeneration and fatty  
47 infiltration in diseased or degenerating muscle (Lemos et al., 2015; Uezumi et al., 2010; Uezumi et al.,  
48 2011). As such, FAPs are important cell targets for therapeutic approaches (Contreras et al., 2016;  
49 Gonzalez et al., 2017; Lemos et al., 2015; Mozzetta et al., 2013). FAPs are activated upon injury to  
50 proliferate (Joe et al., 2010; Uezumi et al., 2010) and are cleared by apoptosis in the course of  
51 regeneration (Lemos et al., 2015). The intrinsic mechanisms of activation and pro-myogenic function  
52 as well as the mechanisms that promote fibrotic or adipogenic conversion are not well understood.  
53 Murine FAPs were characterized using different cell surface marker combinations. Joe et al. (2010)  
54 used the combination of  $lin^{-};Sca1^{+};CD34^{+}$  or equivalently  $lin^{-};\alpha7\text{-integrin}^{-};Sca1^{+}$  to isolate FAPs,  
55 while Uezumi et al (2014a; 2010) used  $lin^{-};PDGFR\alpha^{+}$  to isolate FAPs from mouse and human muscle.  
56 Both, the  $Sca1^{+}$  and  $PDGFR\alpha^{+}$  populations appear to largely overlap (Uezumi, Ikemoto-Uezumi and  
57 Tsuchida, 2014b). In addition, FAPs show overlap with  $Tcf4^{+}$  cells originally defined as muscle  
58 connective tissue fibroblasts (Murphy et al., 2011; Vallecillo-García et al., 2017) as well as with the  
59  $PDGFR\alpha^{+}$  subpopulation of PICs ( $PW1^{+}$  interstitial cells). PICs are  $Sca1^{+}$  and  $CD34^{+}$  and are marked by  
60 expression of the paternally imprinted gene  $PW1$  ( $Peg3$ ), which is a general stem cell / progenitor cell  
61 marker (Berg et al., 2011; Besson et al., 2011). PICs were originally characterized as an interstitial  
62 multipotent population distinct from satellite cells (Mitchell et al., 2010). Later it was shown that PICs  
63 can be divided into  $PDGFR\alpha^{-}$  myogenic PICs and  $PDGFR\alpha^{+}$  adipogenic PICs that completely overlap  
64 with FAPs (Pannerec et al., 2013). The above mentioned markers label tissue-resident quiescent FAPs

65 as well as FAPs activated upon injury or disease. To date, no molecular marker has been found to  
66 identify injury-activated FAPs, and no tool exists to specifically purify or manipulate this population,  
67 precluding analyses as well as genetic manipulation or *in vivo* lineage tracing of injury-activated FAPs.  
68 The identification of an activated FAP-specific molecular marker promises to greatly facilitate our  
69 understanding of the intrinsic mechanisms of FAP activation, function, and differentiation under  
70 normal or pathological conditions. Here we show that FAPs become positive for the transcription  
71 factor *Osr1* (Odd skipped-related 1) in response to injury and that *Osr1* expression can be used to  
72 follow, isolate, and genetically mark activated FAPs during the pathological and as normal muscle  
73 repair.

## 74 Results and Discussion

### 75 **Osr1 is expressed in a small number of adult FAPs**

76 During development, *Osr1* marks a lateral plate mesoderm-derived population of fibro-adipogenic  
77 cells that is also a source for adult  $\text{Sca1}^+$  and  $\text{PDGFR}\alpha^+$  FAPs (Vallecillo-García et al., 2017). However,  
78 *Osr1* expression declines during development and early postnatal life in mice, and eGFP expressed  
79 from the *Osr1* locus (*Osr1*<sup>GCE</sup> mouse line; Mugford et al., 2008) is only detectable *in situ* by antibody  
80 staining during early postnatal life but is below detectable levels in adults (Vallecillo-García et al.,  
81 2017). To increase detection sensitivity, we inserted a  $\beta$ -galactosidase ( $\beta$ -Gal) reporter into the *Osr1*  
82 locus (*Osr1*<sup>LacZ</sup>, Fig. S1A), which allows for enzymatic signal amplification. The expression of the  
83 *Osr1*<sup>LacZ</sup> allele recapitulated the developmental expression pattern of *Osr1* (Fig. S1B). Using the  
84 *Osr1*<sup>LacZ</sup> line, we observed the presence of a low number of  $\text{Osr1}^+$  cells in the interstitium of several  
85 muscles examined (Fig. 1A). We noted that these cells are also positive for  $\text{PDGFR}\alpha$  (Fig. 1B). FACS-  
86 cytopsin of FAPs ( $\text{lin}^-; \alpha7\text{-integrin}^-; \text{Sca1}^+$ ) isolated from whole hindlimb muscle of *Osr1*<sup>LacZ</sup> mice  
87 revealed that approx. 4.5% of adult FAPs were  $\text{Osr1-}\beta\text{-Gal}^+$  (Fig. 1C, Fig. S2). No  $\beta$ -Gal Signal was  
88 detected in  $\text{lin}^-; \alpha7\text{-integrin}^-; \text{Sca1}^-$  cells (double negative, DN cells) or  $\text{lin}^-; \alpha7\text{-integrin}^+; \text{Sca1}^-$  cells  
89 (satellite cells, SC) (Fig. 1C). We complemented this approach by isolating FAPs from *PW1*<sup>LacZ</sup> animals  
90 ( $\text{lin}^-; \text{PW1}^+; \text{PDGFR}\alpha^+$ ); this protocol yielded a population that completely overlapped FAPs (Pannerec  
91 et al., 2013). Low abundance of *Osr1* mRNA in adult FAPs was confirmed by semiquantitative PCR  
92 (Fig. 1D). This suggests that *Osr1* is expressed in a small proportion of adult FAPs and is consistent  
93 with deep RNA sequencing data from adult resident FAPs showing low *Osr1* mRNA expression  
94 (Ollitrault et al. in preparation).

95

### 96 **Osr1 expression is induced to high levels upon acute injury**

97 Freeze-pierce injury performed on *Osr1*<sup>LacZ</sup> tibialis anterior (TA) muscle led to an accumulation of  
98  $\text{Osr1}^+$  cells in the injured region 3 and 5 days post injury (dpi) (Fig. 2A). We used both *Osr1*<sup>GCE</sup> and

99 *Osr1<sup>LacZ</sup>* alleles to analyze which cells initiated *Osr1* expression. First, FAPs were FACS isolated from  
100 *Osr1<sup>GCE</sup>* mice as *lin<sup>-</sup>;α7-integrin<sup>-</sup>;Sca1<sup>+</sup>* (Joe et al., 2010; Fig. S3A, B) and analyzed for *Osr1*-eGFP  
101 expression. Using this allele, we found that in uninjured muscle approx. 3.3% of FAPs expressed *Osr1*-  
102 eGFP (Fig. 2B), in agreement with results obtained from the *Osr1<sup>LacZ</sup>* line (Fig. 1C). The numbers of  
103 *Osr1*-eGFP<sup>+</sup> FAPs increased upon injury to 17 – 19% (approx. 5 – 6 fold increase) at 3, 5 and 7 dpi (Fig.  
104 2B). At 10 dpi, the fraction of *Osr1*-eGFP<sup>+</sup> FAPs decreased (8,5%; Fig. 2B). We note that isolation of  
105 FAPs from the whole TA muscle yields FAPs from non-injured and injured regions, whereas the  
106 concentration of activated FAPs in the injured region is higher. *Osr1*-eGFP was exclusively expressed  
107 in *lin<sup>-</sup>;α7-integrin<sup>-</sup>;Sca1<sup>+</sup>* FAPs and not detected in *lin<sup>-</sup>;α7-integrin<sup>+</sup>;Sca1<sup>-</sup>* SCs or *lin<sup>-</sup>;α7-*  
108 *integrin<sup>-</sup>;Sca1<sup>-</sup>* DN cells at 5 dpi (Fig. S3C). Cytospin analysis of all *lin<sup>-</sup>;α7-integrin<sup>-</sup>;Sca1<sup>+</sup>* FAPs (i.e.  
109 GFP<sup>+</sup> and GFP<sup>-</sup>) followed by immunolabeling for PDGFRα confirmed that after injury 18 – 20% of  
110 PDGFRα<sup>+</sup> FAPs were *Osr1*-GFP<sup>+</sup> at 3, 5 and 7 dpi, while this ratio declined to 8,5% at 10 dpi (Fig. 2C).  
111 In contrast, *Osr1<sup>+</sup>* FAPs were almost completely positive for PDGFRα at all time points analyzed (Fig.  
112 2C, Fig. S4A). Both the *Osr1<sup>+</sup>* and the *Osr1<sup>-</sup>* fraction of *Sca1<sup>+</sup>* FAPs overlapped partly with *Tcf4*  
113 expression (Fig. 2C, Fig. S4A). We note that adult resting FAPs highly overlapped with the *Tcf4<sup>+</sup>*  
114 population (Murphy et al., 2011; Vallecillo-García et al., 2017), while this was not the case after injury  
115 in our analysis. Moreover, the expression of *Tcf4* did not correlate with *Osr1* expression in FAPs after  
116 acute injury, suggesting dynamic changes in the FAP population during regeneration. We further  
117 noted expression of *Tcf4* in *α7-integrin<sup>+</sup>* myogenic cells (Fig. S4B), in agreement with *Tcf4* expression  
118 in a fraction of developmental myoblasts (Mathew et al., 2011).  
119 To corroborate these findings, FAPs were isolated from *Osr1<sup>LacZ</sup>* animals as *lin<sup>-</sup>;Sca1<sup>+</sup>;CD34<sup>+</sup>* and  
120 analyzed via FACS for LacZ and PDGFRα expression (Fig. S5). Since LacZ staining can generate high  
121 background, we gated conservatively likely leading to exclusion of positive cells (Fig. S5B).  
122 Regardless, we could confirm *Osr1*-LacZ expression in 3 dpi *lin<sup>-</sup>;Sca1<sup>+</sup>* FAPs, and that *LacZ<sup>+</sup>;Sca1<sup>+</sup>*

123 FAPs strongly overlapped with PDGFR $\alpha$  expression (Fig. S5C). Adult FAPs originate from a  
124 developmental Osr1<sup>+</sup> lineage (Vallecillo-García et al., 2017). Consequently, progeny of developmental  
125 Osr1<sup>+</sup> cells expanded in the injury region upon acute injury (Fig. 2D). Taken together, these data  
126 show that Osr1 expression is induced upon muscle injury specifically in FAPs within the injured  
127 region.

128

129 **Osr1 expression identifies injury-activated FAPs that contribute to adipogenic infiltration and post-**  
130 **injury resident FAPs**

131 An initial rapid induction of proliferation is a hallmark of FAP activation in response to injury (Joe et  
132 al., 2010; Lemos et al., 2015; Uezumi et al., 2010) which is followed by apoptosis (Lemos et al., 2015).  
133 Following injury, we noted Ki67-stained Osr1<sup>+</sup> cells in tissue sections from *Osr1<sup>LacZ</sup>* animals (Fig. 3A).  
134 Next, FAPs were isolated (*lin<sup>-</sup>; $\alpha$ 7-integrin<sup>-</sup>;Sca1<sup>+</sup>*) from *Osr1<sup>GCE</sup>* animals at 3, 5 and 7 dpi. Osr1<sup>+</sup> FAPs  
135 showed a significantly higher fraction of Ki67<sup>+</sup> cells than Osr1<sup>-</sup> FAPs (Fig. 3B). In addition, apoptotic  
136 cells detected by immunolabeling for cleaved caspase 3 were exclusively found in the Osr1<sup>+</sup> FAP  
137 population at 7 dpi (Fig. 3C) consistent with the proposal that Osr1<sup>+</sup> cells are activated in response to  
138 injury to undergo cell cycle entry as well as apoptosis.

139 We next tested the suitability of the *Osr1<sup>GCE</sup>* allele to trace the fate of activated FAPs. We genetically  
140 labelled Osr1<sup>+</sup> cells in *Osr1<sup>GCE</sup>;R26<sup>mTmG</sup>* mice for five consecutive days beginning with the day of injury  
141 (Fig. 3D). Since the Osr1<sup>+</sup> FAP population expands in the injured region during this period, we would  
142 anticipate labeling of the activated FAP pool as compared to FAPs in uninjured muscle. Consistent  
143 with this prediction, we observed that pulsing Osr1<sup>+</sup> cells for five days before injury resulted in low  
144 levels of labeling as compared to labeling post injury (Fig. S6). This also suggests that Osr1<sup>+</sup> cells in  
145 adult uninjured muscle do not represent a specific subpopulation prone to quick expansion upon  
146 injury, rather, we propose that sporadic Osr1 expression in uninjured adult muscle results from

147 activated FAPs engaged in focal repair, however this requires further investigation. Lineage tracing in  
148 *Osr1<sup>GCE</sup>;R26<sup>mTmG</sup>* mice induced after injury was performed at 28 days after injury, where regeneration  
149 is almost completed, however the regenerated tissue can be recognized by centrally located  
150 myonuclei. The majority of *Osr1<sup>+</sup>* cell progeny after injury was traced to interstitial PDGFR $\alpha$ <sup>+</sup> cells  
151 representing resident FAPs (Fig. 3D). *Osr1<sup>+</sup>* cells also gave rise to interstitial Tcf4<sup>+</sup> cells (Fig. 3D). This  
152 suggests that *Osr1<sup>+</sup>* activated FAPs return to the resident FAP pool after regeneration as well as to  
153 the Tcf4<sup>+</sup> muscle connective tissue fibroblasts consistent with the proposal that FAPs are a primary  
154 source for fibrosis in degenerative disease (Contreras et al., 2016; Lemos et al., 2015; Mueller et al.,  
155 2016; Uezumi et al., 2011).  
156 In addition to being a source of fibrotic tissue in pathologically remodeled skeletal muscle, FAPs are  
157 also proposed to be a source of fatty infiltration (Lemos et al., 2012; Uezumi et al., 2010; Uezumi et  
158 al., 2011) although this has not been conclusively demonstrated *in situ*. Therefore, we tested the  
159 adipogenic potential of *Osr1<sup>+</sup>* injury-activated FAPs, by glycerol injury in *Osr1<sup>GCE</sup>;R26<sup>mTmG</sup>* mice, which  
160 results in fatty infiltration (Pisani et al., 2010) (Fig. 3E). 14 days after injury, the regenerating region  
161 contains infiltrating adipocytes which are mG positive (Fig. 3E). Taken together, these results provide  
162 a key confirmation for endogenous FAP fibrotic and adipogenic fates *in situ*.

163

#### 164 ***Osr1* marks a transient population of juvenile *Sca1<sup>+</sup>* cells**

165 We noted previously that *Osr1* expression fades in early postnatal life (Vallecillo-García et al., 2017),  
166 which is a period of still active myogenesis. Furthermore, early postnatal development represents a  
167 dynamic phase in which the transition of developmental progenitors to resident stem cells is  
168 accomplished. On this background, we finally re-analyzed *Osr1* expression in juvenile mice. In young  
169 mice (p7)  $\beta$ -Gal from the *Osr1<sup>LacZ</sup>* allele was expressed in muscle interstitial cells (Fig. 4A), most of  
170 which were PDGFR $\alpha$ <sup>+</sup> (86,1%; Fig. 4B). This indicates that *Osr1* is predominantly expressed in juvenile



171 interstitial PDGFR $\alpha$ <sup>+</sup> cells that likely are FAPs / FAP progenitors and hence should also express Sca1  
172 (Pannerec et al., 2013; Uezumi et al., 2010).

173 Juvenile Sca1<sup>+</sup> cells had been analyzed on the background of muscle interstitial PICs (Pannerec et al.,  
174 2013). This study showed that juvenile Sca1<sup>+</sup> cells can be subdivided into two populations: one with  
175 low/medium Sca1 expression levels (Sca1<sup>med</sup>) and a population with high Sca1 expression (Sca1<sup>hi</sup>)  
176 that persists throughout life and completely overlaps with FAPs. We therefore FACS-isolated  
177 Sca1<sup>med</sup>;PW1<sup>+</sup> and Sca1<sup>hi</sup>PW1<sup>+</sup> PICs from 7 day old *PW1<sup>lacZ</sup>* mice as previously described (Pannerec et  
178 al., 2013) and analyzed *Osr1* expression by semiquantitative PCR. Strong *Osr1* expression was seen in  
179 Sca1<sup>med</sup>, whereas lower levels of expression were detected in Sca1<sup>hi</sup> PICs. No detectable levels of  
180 expression were found in Sca1<sup>hi</sup>PW1<sup>-</sup> cells or in satellite cells (Fig. 4C)

181 To further characterize *Osr1*<sup>+</sup> juvenile cells, we first FACS isolated lin<sup>-</sup>;CD34<sup>+</sup>;Sca1<sup>med</sup> and  
182 lin<sup>-</sup>;CD34<sup>+</sup>;Sca1<sup>hi</sup> cells from *Osr1<sup>lacZ</sup>* mice (Fig. 4D). The majority of Sca1<sup>med</sup> cells were  $\beta$ -Gal positive  
183 (79%), of which almost all Sca1<sup>med</sup>; $\beta$ -Gal<sup>+</sup> cells were PDGFR $\alpha$  positive (95%; Fig. 4E). In contrast,  
184 Sca1<sup>med</sup>;PDGFR $\alpha$ <sup>+</sup> cells were mostly  $\beta$ -Gal positive (94%; Fig. 4F). The Sca1<sup>hi</sup> population contained  
185 distinct and separable  $\beta$ -Gal<sup>+</sup> and  $\beta$ -Gal<sup>-</sup> subpopulations. Interestingly, of the Sca1<sup>hi</sup>; $\beta$ -Gal<sup>+</sup>  
186 population only approx. 50% expressed PDGFR $\alpha$  (Fig. 4G). In contrast, most of the Sca1<sup>hi</sup>;PDGFR $\alpha$ <sup>+</sup>  
187 cells were  $\beta$ -Gal<sup>+</sup> (78%; Fig. 4H), showing a prevalence for *Osr1* expression in the PDGFR $\alpha$  fraction.  
188 Taken together, these results show that *Osr1* is expressed primarily in interstitial Sca1<sup>med</sup>;PDGFR $\alpha$ <sup>+</sup>  
189 cells and to lower extent in Sca1<sup>hi</sup>;PDGFR $\alpha$ <sup>+</sup> cells in juvenile muscle.

190 We next re-analyzed the developmental fate of perinatal *Osr1*<sup>+</sup> cells by genetically labeling the *Osr1*  
191 lineage in *Osr1<sup>GCE</sup>;R26<sup>mTmG</sup>* mice. Administration of Tamoxifen (TAM) at p0 and p1 was used to  
192 developmentally trace *Osr1*<sup>+</sup> cells (Fig. 1I). At day p21, *Osr1*<sup>+</sup> progenitors contributed to the muscle  
193 interstitial PDGFR $\alpha$  cell pool (approx. 70%; Fig. 1J) in line with our previous demonstration that adult

194 FAPs derive from these developmental  $Osr1^+$  cells (Vallecillo-García et al., 2017).  $Osr1$  descendants  
195 were also present in cells expressing the muscle connective tissue fibroblast marker, TCF4, although  
196 at a markedly lower number (Fig. 1J). No contribution of  $Osr1^+$  progenitors was seen in  $\alpha$ SMA<sup>+</sup>  
197 vascular smooth muscle or CD31<sup>+</sup> endothelium (Fig. 1K). In addition,  $Osr1^+$  progenitors gave rise to  
198 muscle interstitial adipocytes (Fig. 1L). This shows that juvenile  $Osr1^+$  cells maintain plasticity and  
199 that interstitial fibroblasts as well as interstitial adipocytes derive from this pool in addition to FAPs.  
200 During embryonic development,  $Osr1$  is expressed in  $Sca1^-$  cells whereas  $Sca1$ -expressing muscle  
201 interstitial cells arise during late fetal development, concomitant with the appearance of  $Sca1^+/Osr1^+$   
202 cells (Vallecillo-García et al., 2017). While it remains unresolved whether  $Osr1^+$  cells acquire  $Sca1$   
203 expression during fetal development or whether the  $Sca1^+$  cells arise *de novo*, our observation that  
204  $Osr1$  is predominantly expressed in a transient population of  $Sca1^{med}$  FAPs during postnatal  
205 development has interesting implications. Specifically, we note that  $Osr1$  is expressed in muscle  
206 interstitial mesenchymal cells throughout embryonic and postnatal myogenesis, first in  $Sca1^-$ , later in  
207  $Sca1^{med}$  and to a lesser degree in  $Sca1^{hi}$  cells. This pattern of expression suggests a lineage  
208 continuum in which  $Sca1^{hi}$  cells are derived from  $Sca1^{med}$  cells, and that downregulation of  $Osr1$   
209 expression is required for this differentiation step. Interestingly, both the disappearance of  $Sca1^{med}$   
210 cells and the downregulation of  $Osr1$  expression correlate with the termination of postnatal muscle  
211 growth driven by incorporation of new nuclei into myofibers (Pannerec et al., 2013; White et al.,  
212 2010). These data together with the observation of re-activation of  $Osr1$  expression in injury-  
213 activated FAPs leads to the proposal that  $Osr1$  expression marks FAPs or their progenitors during  
214 periods of active myogenesis. During embryonic myogenesis,  $Osr1^+$  cells provide a pro-myogenic  
215 niche for myogenic progenitors that promotes myogenic cell proliferation and survival. (Vallecillo-  
216 García et al., 2017). Similarly, adult FAPs promote myogenesis *in vitro* (Joe et al., 2010) and  $Tcf4^+$   
217 cells, which in part overlap with FAPs, are required for efficient muscle regeneration (Murphy et al.,

218 2011). The re-activation of Osr1 expression further suggests that adult FAPs reactivate a  
219 developmental program to support tissue regeneration.

220 In summary, we show that Osr1 is the first specific marker identified for injury activated FAPs. Given  
221 the key role for FAPs in promoting proper muscle regeneration, the ability to lineage track these cells  
222 will be invaluable for designing approaches to optimize muscle repair and target the muscle stem cell  
223 niche.

## 224 **Materials and methods**

### 225 **Mice**

226 Mice were maintained in an enclosed, pathogen-free facility. The targeting construct for the *Osr1*  
227 multifunctional allele was electroporated into G4 mouse ES cells (George et al., 2007). The transgenic  
228 locus was confirmed by Southern blotting and Sanger sequencing. Successfully recombined clones  
229 were subjected to tetraploid aggregation. Mice were crossed back to wild type C57BL/6j mice for at  
230 least 6 generations before establishing the line. The following mouse lines were described before:  
231 *Osr1*<sup>GCE</sup> (Mugford et al., 2008); *R26*<sup>LacZ</sup> (Soriano, 1999); *R26*<sup>mTmG</sup> (Muzumdar et al., 2007). Mouse  
232 experiments were performed in accordance with European Union regulations (Directive 2010/63/EU)  
233 and under permission from the Landesamt für Gesundheit und Soziales (LaGeSo) Berlin, Germany  
234 (Permission numbers ZH120, G0240/11, G0114/14, G0209/15, G0268/16).

### 235 **Cell lineage tracing**

236 Lineage tracing of neonatal *Osr1*<sup>+</sup> cells was performed in *Osr1*<sup>GCE/+</sup>;*R26*<sup>LacZ/+</sup> neonates by  
237 subcutaneous injection of Tamoxifen (Sigma Aldrich; solved in 90 % (v/v) sunflower oil/ 10 % (v/v)  
238 ethanol) into the neck fold (75 µg/ g body weight). Lineage tracing of injury-activated *Osr1*<sup>+</sup> FAPs was  
239 performed in *Osr1*<sup>GCE/+</sup>;*R26*<sup>mTmG/+</sup> or *Osr1*<sup>GCE</sup>;*R26*<sup>LacZ</sup> mice by intraperitoneal injection of Tamoxifen at  
240 the day of injury and the next 4 following days (3 mg per injection time point). For lineage tracing of  
241 *Osr1*<sup>+</sup> cells before injury, *Osr1*<sup>GCE/+</sup>;*R26*<sup>LacZ/+</sup> and *Osr1*<sup>GCE/+</sup>;*R26*<sup>mTmG/+</sup> animals were injected with  
242 3mg Tamoxifen for 5 consecutive days one week before injury.

### 243 **Muscle injury**

244 Injury was applied to the tibialis anterior muscle of 3-5 months old *Osr1*<sup>GCE</sup>, *Osr1*<sup>LacZ</sup>, *Osr1*<sup>GCE</sup>;*R26*<sup>mTmG</sup>  
245 or *Osr1*<sup>GCE</sup>;*R26*<sup>LacZ</sup> mice using the freeze-pierce technique. Mice were anesthetized by intraperitoneal  
246 injection of 10 % (v/v) ketamine / 2 % (v/v) xylazine (Rompun® 2%) in sterile PBS (5 µl / g body  
247 weight). Mice were kept on a heating plate warmed to 37°C throughout the procedure. The skin  
248 above the Tibialis anterior muscle was opened and the muscle was longitudinally pierced 5 times  
249 using a 0.7 mm liquid nitrogen cooled syringe needle.

250 For glycerol injury mice were anesthetized as described above. Skin above the Tibialis anterior  
251 muscle was opened and 25µl of 50% v/v glycerol/sterile PBS were injected into the muscle.

### 252 **Histology, antibody labeling**

253 Muscle was dissected, immediately embedded in 6 % (w/v) gum tragacanth (Sigma Aldrich) dissolved  
254 in H<sub>2</sub>O and snap frozen in liquid nitrogen cooled isopentane (-160 °C). Frozen tissue was sectioned at  
255 7 µm and fixed using 4 % (w/v) PFA in PBS for 5 min at RT.

256 Permeabilization of sections was performed in 0.3% (v/v) Triton X-100 (Sigma Aldrich) in phosphate  
257 buffer (PBS) for 10 min. Sections from adult tissues were blocked with 5% (w/v) bovine serum  
258 albumin (Sigma Aldrich) in PBS. Sections then preincubated with 5% horse serum, 5mg mL<sup>-1</sup> blocking  
259 reagent (Perkin Elmer) and 0.1% Triton X-100 in PBS for 1h at RT. Primary antibodies were applied in  
260 the same solution and incubated at 4 °C overnight, followed by secondary antibody staining for 1h at  
261 room temperature. Antibodies are listed below. Counterstaining was performed with 5µg µL<sup>-1</sup> 4',6-  
262 diamidino-2-phenylindole (DAPI; Invitrogen), slides were mounted with FluoromountG  
263 (SouthernBiotech). Antibodies are listed in Additional file 1, Supplementary tables 1 and 2.

264 For beta galactosidase detection, sections or cells were fixed as above and incubated at 37°C  
265 overnight in X-Gal (0.16 % (w/v) X-Gal, 5mM K<sub>3</sub>Fe(CN)<sub>6</sub>, 5 mM K<sub>4</sub>Fe(CN)<sub>6</sub>, 2 mM MgCl<sub>2</sub> in PBS). Beta  
266 galactosidase development was stopped by washing in PBS. For whole-mount X-Gal stainings  
267 embryos were fixed in X-Gal fixing solution (1 % (w/v) Formaldehyde, 0.2 % (w/v) Glutaraldehyde,  
268 0.02 % (v/v) NP-40, 1 % (v/v) PBS in bidest H<sub>2</sub>O) for 1 h at 4°C, then stained for 24 h at 37°C in X-Gal  
269 staining solution.

### 270 **Cell isolation and flow cytometry**

271 Cell isolation and labeling was essentially performed as described in (Vallecillo-García et al., 2017).

272 Isolation of cells from Osr1<sup>GCE/+</sup> mice was performed as follows: Briefly, whole hind limb or *tibialis*  
273 *anterior* muscles were carefully isolated, roughly minced and digested in high-glucose DMEM  
274 medium containing 10% fetal calf serum (FCS, Biochrom), 1% Penicillin Streptomycin solution (P/S;  
275 10000 U/ml) and 2,5 mg/ml Collagenase A (Roche) for 75 min at 37°C with vigorous shaking. 2 IU/ml  
276 of Dispase II (Sigma Aldrich) were added to the digestion solution and muscle lysates were digested

277 for further 30 min. Muscle slurries were passed 10 times through a 20G syringe (BD Bioscience) and a  
278 70- $\mu$ m cell strainer. Cells were collected by centrifugation at 300g for 5 min and resuspended in  
279 staining buffer consisting of 500 $\mu$ l Hank's balanced salt solution (HBSS, Thermo Fisher scientific), 0.4  
280 % bovine serum albumin (Sigma Aldrich) and 20 $\mu$ g/ml Gentamycin (Serva Electrophoresis). Cells were  
281 stained on ice for 30 min and washed twice with staining buffer previous to FACS sorting. Propidium  
282 iodide was used as a viability dye.

283 Isolation of cells from *Osr1*<sup>LacZ/+</sup> animals was performed as follows: freshly dissected muscle tissue  
284 was minced and digested in HBSS (Gibco) supplemented with 2.4 U/ml Dispase II (Roche), 2  $\mu$ g/ml  
285 Collagenase A (Roche), 0.4 mM CaCl<sub>2</sub>, 5 mM MgCl<sub>2</sub>, 10 ng/ml DNase I (Roche) for 2 h at 37°C under  
286 agitation. Single cell suspension was obtained after 3 successive cycles of straining and washing in  
287 Washing Buffer consisting of HBSS containing 0.2% (w/v) BSA (Sigma Aldrich), 1% (v/v) penicillin-  
288 streptomycin, 10 ng/ml DNase I and 10% (v/v) mouse serum. Cells were incubated with primary  
289 antibodies for 1 h on ice. The suspension was subjected to 2 washing steps, resuspended in Washing  
290 Buffer and to LacZ reporter staining using C<sub>12</sub>FDG (Life Technologies). For lacZ staining C<sub>12</sub>FDG was  
291 added to the cell suspension to a final concentration of 600  $\mu$ M and incubated for 30 min at 37°C. 2  
292 washing steps followed before proceeding to FACS analysis.

293 Cells purified by sorting were cytospun to coverslips. Coverslips were coated with poly-L-lysine by  
294 incubation with a 10-fold solution of poly-lysine in bidest H<sub>2</sub>O for 1 h at RT, rinsed twice in bidest H<sub>2</sub>O  
295 and air dried. Purified cells were added to prepared slides and allowed to adhere for 1 h at 4°C.  
296 Supernatant was removed by centrifugation at 50 rcf for 5 min at 4°C, cells were fixed using 4% (w/v)  
297 PFA in PBS for 5 min at RT and permeabilized with 0.3% (v/v) Triton X-100 in PBS for 5 min at RT.  
298 Antibodies are listed in Additional file 1, Supplementary tables 1 and 2.

299 Sorts and analyses were performed on a FACS Aria II (BD Biosciences). Sorting gates were defined  
300 based on unstained controls. Data were collected using FACSDIVA software. Biexponential analyses  
301 were performed using FlowJo 10 (FlowJo LLC) software. Analysis was performed on three  
302 independent biological replicates.

### 303 Cell quantification

304 Quantification of FACS-isolated Osr1<sup>+</sup> cells after immunolabelling (cytospin) was performed on at  
305 least three independent biological replicates (i.e. cells FACS isolated from three different animals).  
306 Quantifications of cytopun cells were made from two areas of 0.81 mm<sup>2</sup> per replicate.  
307 Student's t-test was performed using Prism 5 (GraphPad) software. Error bars in all figures, including  
308 supplementary information, represent the mean ± standard error of the mean (s.e.m).

### 309 **Microscopy**

310 Images were acquired using a Zeiss LSM700 confocal microscope, a Leica DMR or Leica DMI8  
311 microscope. Bright field images of whole-mount embryos were taken with a Leica Leica MZ12 stereo  
312 microscope. Images were captured using Axio Vision Rel. 4.8 and Zen 2010 (Zeiss) or LAS X (Leica).

313 **Acknowledgements**

314 We thank the animal facility of the Max Planck Institute for Molecular Genetics, Berlin for expert  
315 support, especially Karol Macura, Judith Fiedler, Lars Wittler, Andrea König, Katja Zill and Ludger  
316 Hartmann.

317

318 **Competing interests**

319 No competing interests declared

320

321 **Funding**

322 This work was funded by the German Research Foundation (DFG; grant GK1631), French-German  
323 University (UFA-DFH; grant CDFA-06-11), the Association Française contre les Myopathies (AFM  
324 16826), and the Fondation pour la Recherche Médicale (FRM DEQ20140329500) as part of the  
325 MyoGrad International Research Training Group for Myology. This work was funded by the Focus  
326 Area DynAge of the Freie Universität Berlin. We acknowledge support by the German Research  
327 Foundation and the OpenAccess Publication Fund of the Freie Universität Berlin.

328

329 **Author's contributions:**

330 DAS and SS conceived and designed the study. JS, PVG, SvHS and DO performed experiments and  
331 collected data. JS, PVG, SvHS, DO, GM, DAS and SS performed data analysis and interpretation. ANE  
332 generated the Osr1-LacZ knock-in construct and HS generated the Osr1-LacZ knock-in ES cells. DAS  
333 and SS wrote the manuscript with help from JS and GM.

334

335

336

337

338

339



340 **References**

- 341 **Bentzinger, C. F., Wang, Y. X., Dumont, N. A. and Rudnicki, M. A.** (2013) Cellular dynamics in the  
342 muscle satellite cell niche. *EMBO Rep*, **14**, 1062-1072.
- 343 **Berg, J. S., Lin, K. K., Sonnet, C., Boles, N. C., Weksberg, D. C., Nguyen, H., Holt, L. J., Rickwood, D.,**  
344 **Daly, R. J. and Goodell, M. A.** (2011) Imprinted genes that regulate early mammalian growth  
345 are coexpressed in somatic stem cells. *PLoS One*, **6**, e26410.
- 346 **Besson, V., Smeriglio, P., Wegener, A., Relaix, F., Nait Oumesmar, B., Sassoon, D. A. and Marazzi, G.**  
347 (2011) PW1 gene/paternally expressed gene 3 (PW1/Peg3) identifies multiple adult stem and  
348 progenitor cell populations. *Proc Natl Acad Sci U S A*, **108**, 11470-11475.
- 349 **Contreras, O., Rebolledo, D. L., Oyarzun, J. E., Olguin, H. C. and Brandan, E.** (2016) Connective tissue  
350 cells expressing fibro/adipogenic progenitor markers increase under chronic damage:  
351 relevance in fibroblast-myofibroblast differentiation and skeletal muscle fibrosis. *Cell Tissue*  
352 *Res*, **364**, 647-660.
- 353 **George, S. H., Gertsenstein, M., Vintersten, K., Korets-Smith, E., Murphy, J., Stevens, M. E., Haigh, J.**  
354 **J. and Nagy, A.** (2007) Developmental and adult phenotyping directly from mutant  
355 embryonic stem cells. *Proc Natl Acad Sci U S A*, **104**, 4455-4460.
- 356 **Gonzalez, D., Contreras, O., Rebolledo, D. L., Espinoza, J. P., van Zundert, B. and Brandan, E.** (2017)  
357 ALS skeletal muscle shows enhanced TGF-beta signaling, fibrosis and induction of  
358 fibro/adipogenic progenitor markers. *PLoS One*, **12**, e0177649.
- 359 **Joe, A. W., Yi, L., Natarajan, A., Le Grand, F., So, L., Wang, J., Rudnicki, M. A. and Rossi, F. M.** (2010)  
360 Muscle injury activates resident fibro/adipogenic progenitors that facilitate myogenesis. *Nat*  
361 *Cell Biol*, **12**, 153-163.
- 362 **Lemos, D. R., Babaeijandaghi, F., Low, M., Chang, C. K., Lee, S. T., Fiore, D., Zhang, R. H., Natarajan,**  
363 **A., Nedospasov, S. A. and Rossi, F. M.** (2015) Nilotinib reduces muscle fibrosis in chronic  
364 muscle injury by promoting TNF-mediated apoptosis of fibro/adipogenic progenitors. *Nature*  
365 *medicine*, **21**, 786-794.

- 366 **Lemos, D. R., Paylor, B., Chang, C., Sampaio, A., Underhill, T. M. and Rossi, F. M.** (2012) Functionally  
367 convergent white adipogenic progenitors of different lineages participate in a diffused  
368 system supporting tissue regeneration. *Stem Cells*, **30**, 1152-1162.
- 369 **Mathew, S. J., Hansen, J. M., Merrell, A. J., Murphy, M. M., Lawson, J. A., Hutcheson, D. A., Hansen,**  
370 **M. S., Angus-Hill, M. and Kardon, G.** (2011) Connective tissue fibroblasts and Tcf4 regulate  
371 myogenesis. *Development*, **138**, 371-384.
- 372 **Mitchell, K. J., Pannerec, A., Cadot, B., Parlakian, A., Besson, V., Gomes, E. R., Marazzi, G. and**  
373 **Sassoon, D. A.** (2010) Identification and characterization of a non-satellite cell muscle  
374 resident progenitor during postnatal development. *Nat Cell Biol*, **12**, 257-266.
- 375 **Mozzetta, C., Consalvi, S., Saccone, V., Tierney, M., Diamantini, A., Mitchell, K. J., Marazzi, G.,**  
376 **Borsellino, G., Battistini, L., Sassoon, D., et al** (2013) Fibroadipogenic progenitors mediate  
377 the ability of HDAC inhibitors to promote regeneration in dystrophic muscles of young, but  
378 not old Mdx mice. *EMBO molecular medicine*, **5**, 626-639.
- 379 **Mueller, A. A., van Velthoven, C. T., Fukumoto, K. D., Cheung, T. H. and Rando, T. A.** (2016) Intronic  
380 polyadenylation of PDGFRalpha in resident stem cells attenuates muscle fibrosis. *Nature*,  
381 **540**, 276-279.
- 382 **Mugford, J. W., Sipila, P., McMahon, J. A. and McMahon, A. P.** (2008) Osr1 expression demarcates a  
383 multi-potent population of intermediate mesoderm that undergoes progressive restriction to  
384 an Osr1-dependent nephron progenitor compartment within the mammalian kidney. *Dev*  
385 *Biol*, **324**, 88-98.
- 386 **Murphy, M. M., Lawson, J. A., Mathew, S. J., Hutcheson, D. A. and Kardon, G.** (2011) Satellite cells,  
387 connective tissue fibroblasts and their interactions are crucial for muscle regeneration.  
388 *Development*, **138**, 3625-3637.
- 389 **Muzumdar, M. D., Tasic, B., Miyamichi, K., Li, L. and Luo, L.** (2007) A global double-fluorescent Cre  
390 reporter mouse. *Genesis*, **45**, 593-605.
- 391 **Pannerec, A., Formicola, L., Besson, V., Marazzi, G. and Sassoon, D. A.** (2013) Defining skeletal  
392 muscle resident progenitors and their cell fate potentials. *Development*, **140**, 2879-2891.

- 393 **Pannerec, A., Marazzi, G. and Sassoon, D.** (2012) Stem cells in the hood: the skeletal muscle niche.  
394 *Trends Mol Med*, **18**, 599-606.
- 395 **Pisani, D. F., Bottema, C. D., Butori, C., Dani, C. and Dechesne, C. A.** (2010) Mouse model of skeletal  
396 muscle adiposity: a glycerol treatment approach. *Biochem Biophys Res Commun*, **396**, 767-  
397 773.
- 398 **Soriano, P.** (1999) Generalized lacZ expression with the ROSA26 Cre reporter strain. *Nat Genet*, **21**,  
399 70-71.
- 400 **Uezumi, A., Fukada, S., Yamamoto, N., Ikemoto-Uezumi, M., Nakatani, M., Morita, M., Yamaguchi,**  
401 **A., Yamada, H., Nishino, I., Hamada, Y., et al** (2014a) Identification and characterization of  
402 PDGFRalpha+ mesenchymal progenitors in human skeletal muscle. *Cell Death Dis*, **5**, e1186.
- 403 **Uezumi, A., Fukada, S., Yamamoto, N., Takeda, S. and Tsuchida, K.** (2010) Mesenchymal progenitors  
404 distinct from satellite cells contribute to ectopic fat cell formation in skeletal muscle. *Nat Cell*  
405 *Biol*, **12**, 143-152.
- 406 **Uezumi, A., Ikemoto-Uezumi, M. and Tsuchida, K.** (2014b) Roles of nonmyogenic mesenchymal  
407 progenitors in pathogenesis and regeneration of skeletal muscle. *Frontiers in physiology*, **5**,  
408 68.
- 409 **Uezumi, A., Ito, T., Morikawa, D., Shimizu, N., Yoneda, T., Segawa, M., Yamaguchi, M., Ogawa, R.,**  
410 **Matev, M. M., Miyagoe-Suzuki, Y., et al** (2011) Fibrosis and adipogenesis originate from a  
411 common mesenchymal progenitor in skeletal muscle. *J Cell Sci*, **124**, 3654-3664.
- 412 **Vallecillo-García, P., Orgeur, M., vom Hofe-Schneider, S., Stumm, J., Kappert, V., Ibrahim, D. M.,**  
413 **Börno, S. T., Hayashi, S., Relaix, F., Hildebrandt, K., et al** (2017) Odd skipped-related 1  
414 identifies a population of embryonic fibro-adipogenic progenitors regulating myogenesis  
415 during limb development. *Nature communications*, **8**, 1218.
- 416 **White, R. B., Bierinx, A. S., Gnocchi, V. F. and Zammit, P. S.** (2010) Dynamics of muscle fibre growth  
417 during postnatal mouse development. *BMC developmental biology*, **10**, 21.
- 418
- 419

420 **Figure Legends**

421

422 **Fig. 1. *Osr1* is sporadically expressed in adult FAPs**

423 **(A)** X-Gal staining on *Osr1*<sup>LacZ/+</sup> several adult mouse muscles muscle shows sporadic X-Gal<sup>+</sup> cells. **(B)** X-  
424 Gal positive cells also express PDGFR $\alpha$ . **(C)** Isolation of CD45<sup>-</sup>;CD31<sup>-</sup>;Ter119<sup>-</sup>; $\alpha$ 7-integrin<sup>-</sup>;Sca1<sup>+</sup> FAPs  
425 from adult uninjured tibialis anterior of *Osr1*<sup>LacZ</sup> mice followed by cytopsin shows that only FAPs  
426 express *Osr1* (n=3 animals). **(D)** Semiquantitative PCR on interstitial populations isolated from adult  
427 PW1<sup>LacZ</sup> mice. Faint *Osr1* expression can be detected in PDGFR $\alpha$ <sup>+</sup> PICs.

428

429

430 **Fig. 2. *Osr1* expression is reactivated in FAPs upon acute injury**

431 **(A)** X-Gal staining on *Osr1*<sup>LacZ/+</sup> adult tibialis anterior muscle 3 and 5 days post injury (dpi) shows  
432 accumulation of *Osr1*-LacZ positive cells in the injury region. **(B)** FACS analysis of FAPs isolated at 3, 5,  
433 7 and 10 dpi from *Osr1*<sup>GCE/+</sup> mice for *Osr1*-GFP expression (n=3 animals for each time point). **(C)**  
434 Quantification of cytopsin analysis of GFP<sup>+</sup> and GFP<sup>-</sup> FAPs isolated at indicated time points after  
435 injury from *Osr1*<sup>GCE/+</sup> mice (n=3 animals). **(D)** Long-term lineage tracing using *Osr1*<sup>GCE</sup>;R26<sup>LacZ</sup> animals  
436 Tamoxifen pulsed at p0 and p1 shows that the progeny of *Osr1*<sup>+</sup> developmental cells expand in the  
437 injury region upon acute muscle injury in adult animals.

438

439

440 **Fig. 3. *Osr1* marks injury-activated fibro-adipogenic progenitors (FAPs)**

441 **(A)** X-Gal<sup>+</sup> (*Osr1* expressing) cells in the injury region (*Osr1*<sup>LacZ/+</sup> animal; 3dpi) are positive for the cell  
442 cycle marker Ki67. **(B, C)** Cytospin of lin<sup>-</sup>; $\alpha$ 7-integrin<sup>-</sup>;Sca1<sup>+</sup> FAPs FACS-isolated at indicated days post  
443 injury (dpi) and separated into GFP<sup>+</sup> and GFP<sup>-</sup> populations were stained for the proliferation marker

444 Ki67 **(B)** and the apoptosis marker cleaved caspase 3 **(C)** (n=3 independent experiments).  
445 Quantification shown right. **(D)** Lineage tracing of  $Osr1^{+}$  cells in  $Osr1^{GCE};R26^{mTmG}$  animals Tamoxifen-  
446 pulsed for five consecutive days after freeze-pierce injury. Contribution of  $Osr1^{+}$  cells to  $PDGFR\alpha^{+}$   
447 and  $Tcf4^{+}$  interstitial cells was analyzed 28 days post injury (dpi). Quantification is shown below (n=3  
448 animals). **(E)** Lineage tracing of  $Osr1^{+}$  cells in  $Osr1^{GCE};R26^{mTmG}$  animals Tamoxifen-pulsed for five  
449 consecutive days after glycerol injection injury. Contribution of  $Osr1^{+}$  cells to ectopic adipose tissue  
450 labelled for Perilipin (PLIN) was analyzed at 14 dpi. Data are represented as means +/- SEM; t-test: \*  
451 =  $P < 0,05$ , \*\* =  $p < 0,01$ , \*\*\* =  $p < 0,005$ , n.s. = not significant.

452

453

454 **Fig. 4. In juvenile mice *Osr1* is expressed in a transient  $Sca1^{med}$  population**

455 **(A)** X-Gal staining on 7 day old  $Osr1^{LacZ/+}$  tibialis anterior muscle shows  $Osr1-LacZ^{+}$  interstitial cells. **(B)**  
456  $Osr1-LacZ$  positive cells are mostly positive for  $PDGFR\alpha$  *in situ* (n=3 animals). **(C)** Semiquantitative  
457 PCR on interstitial populations isolated from 7 day old  $PW1^{LacZ}$  mice. Strong *Osr1* expression can be  
458 detected in  $Sca1^{med}$  PICs, while faint *Osr1* expression can be detected in  $Sca1^{hi}$  PICs. **(D)** Isolation of  
459  $CD34^{+}/Sca1^{+}$  cells from 7 day old tibialis anterior muscles; the  $Sca1^{med}$  and  $Sca1^{hi}$  populations are  
460 discernible. **(E, F)** Analysis of the  $Sca1^{med}$  population. **(E)**  $Sca1^{med}$  cells are mostly  $PDGFR\alpha$  positive;  
461  $Sca1^{med} PDGFR\alpha^{+}$  cells mostly express  $\beta$ -Gal. **(F)**  $Sca1^{med};\beta$ -Gal<sup>+</sup> cells express  $PDGFR\alpha$ . **(G, H)** Analysis  
462 of  $Sca1^{hi}$  cells. **(G)**  $Sca1^{hi}$  cells are only in part positive for  $PDGFR\alpha$ ;  $Sca1^{hi};PDGFR\alpha^{+}$  cells mostly  
463 express  $\beta$ -Gal. **(H)** Only approx. half of  $Sca1^{hi}$  cells express  $\beta$ -Gal;  $Sca1^{hi};\beta$ -Gal<sup>+</sup> cells are also only in  
464 part  $PDGFR\alpha^{+}$ . **(I-L)** Lineage analysis of perinatal  $Osr1^{+}$  cells. **(I)** Lineage tracing strategy. Tamoxifen  
465 was administered at p0/p1, analysis was performed at 3 weeks of age; adipogenic differentiation was  
466 analyzed at 7 weeks of age. **(J)**  $Osr1^{+}$  progeny majorly express  $PDGFR\alpha$ , but in part also  $TCF4$ .

467 Quantification shown right (n= 2 animals). **(K)** Osr1<sup>+</sup> cells do not give rise to CD31<sup>+</sup> endothelial cells  
468 or  $\alpha$ SMA<sup>+</sup> smooth muscle cells. **(L)** Osr1<sup>+</sup> cells give rise to muscle interstitial adipocytes labelled for  
469 Perilipin (PLIN). Data are represented as means +/- SEM  
470

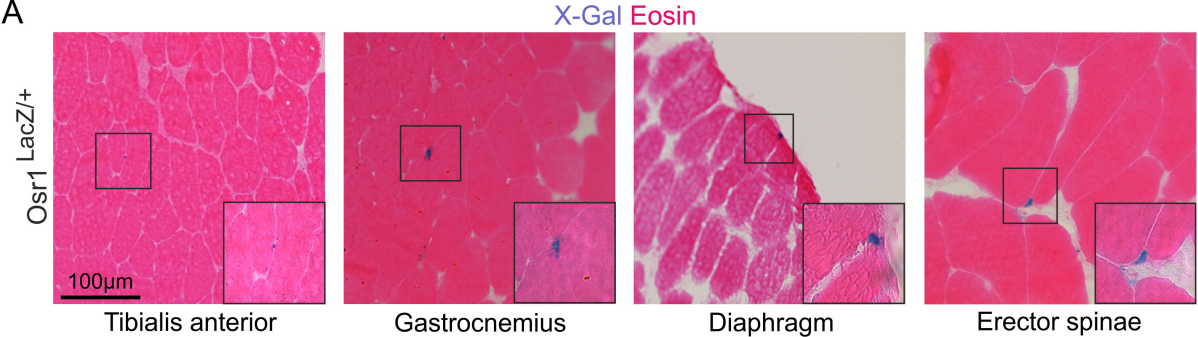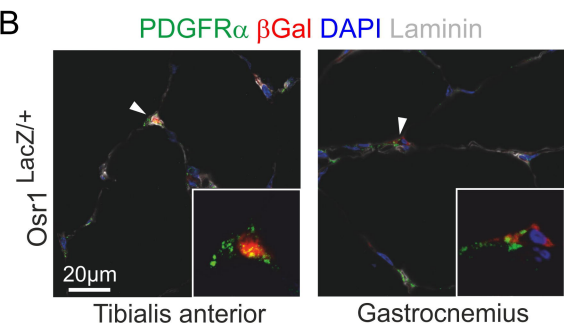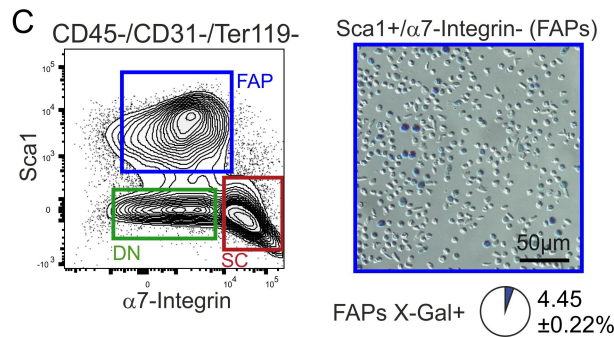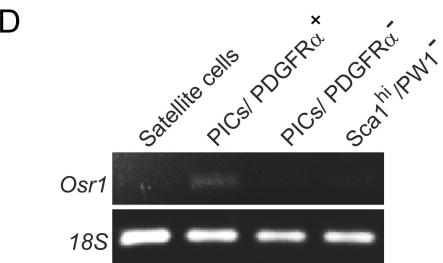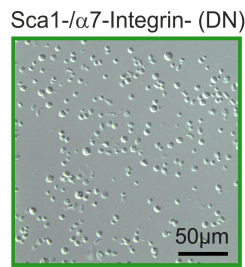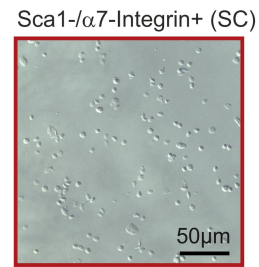

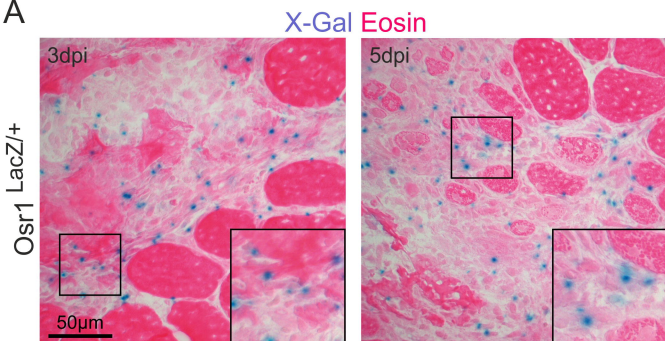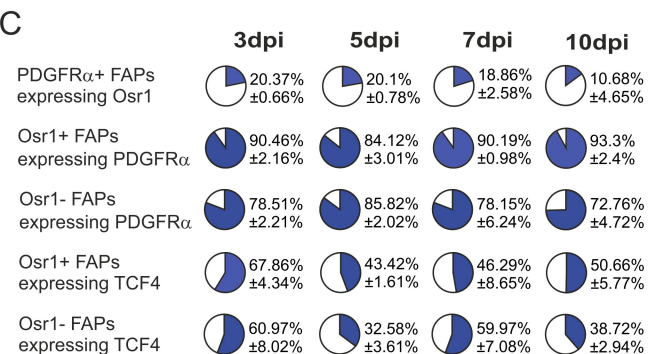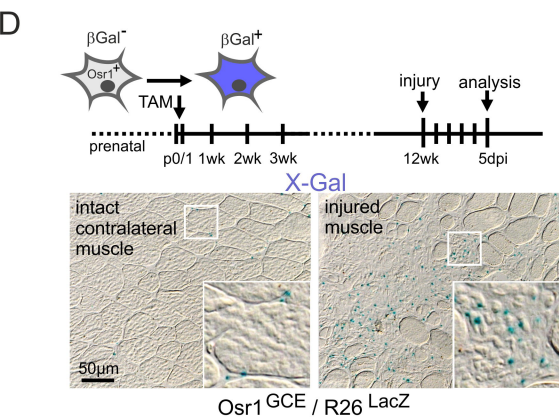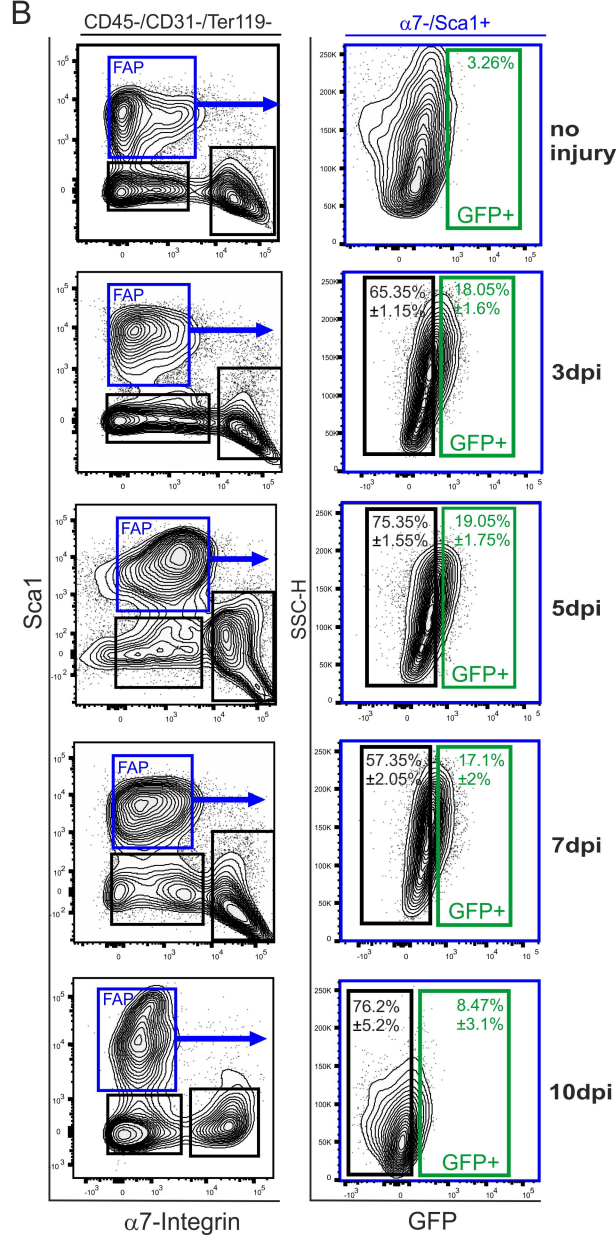



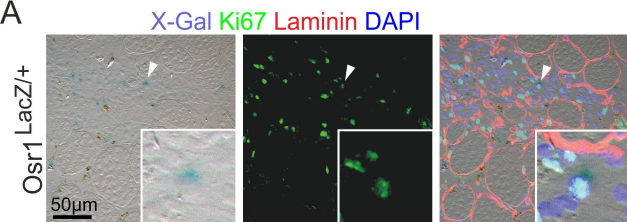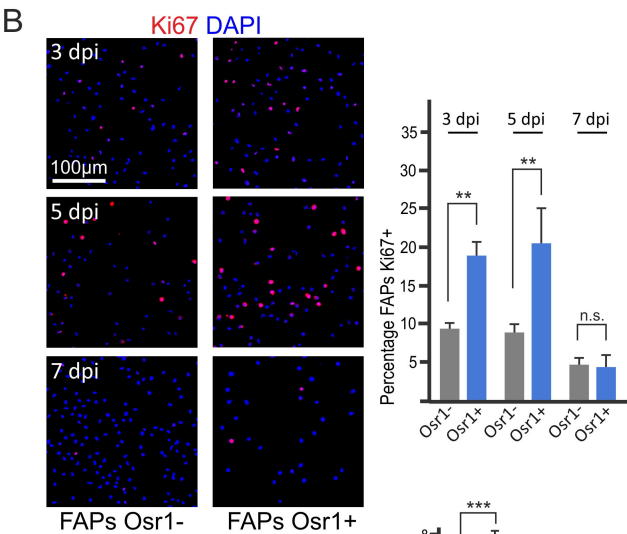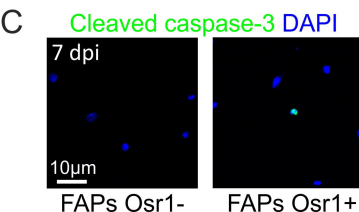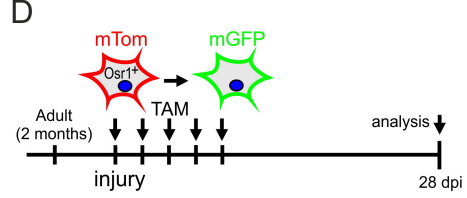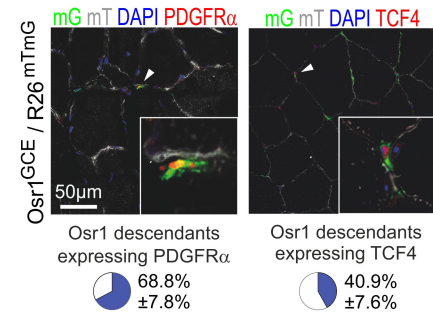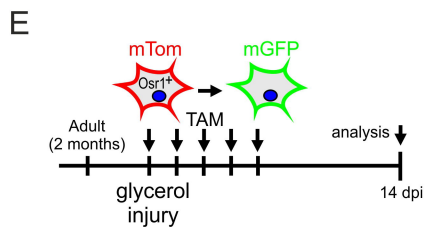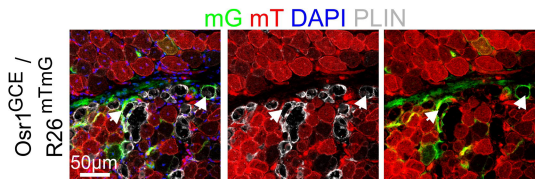

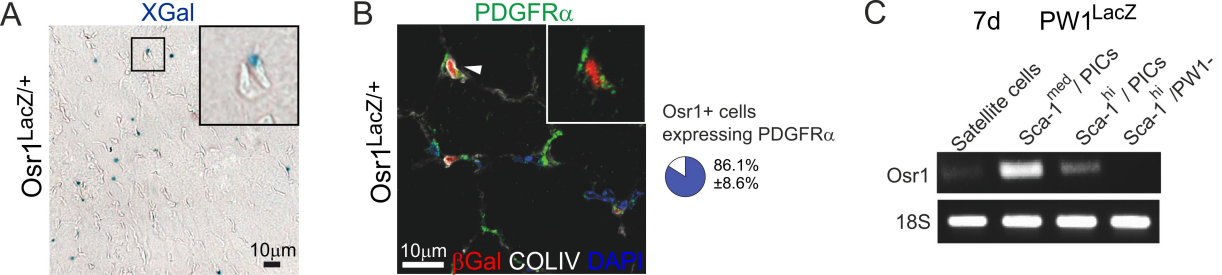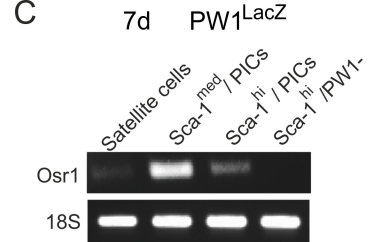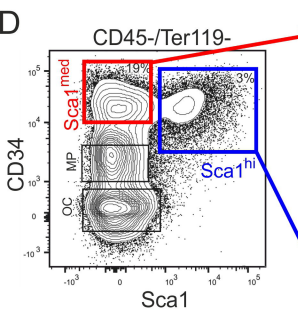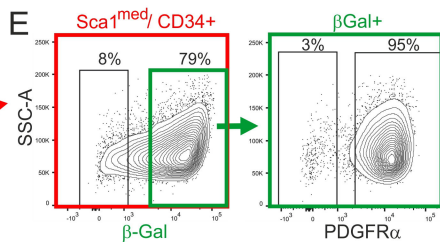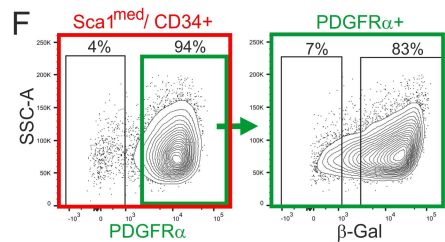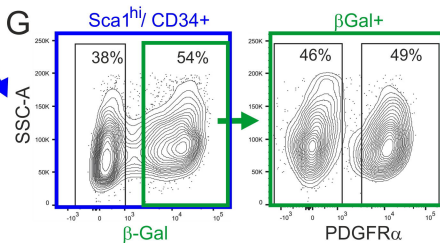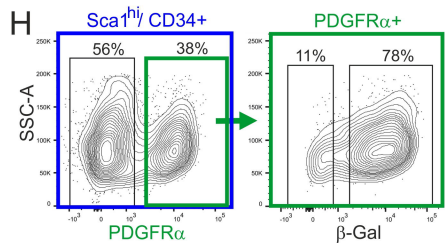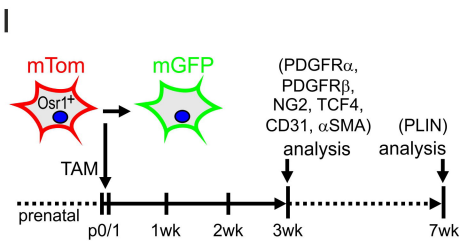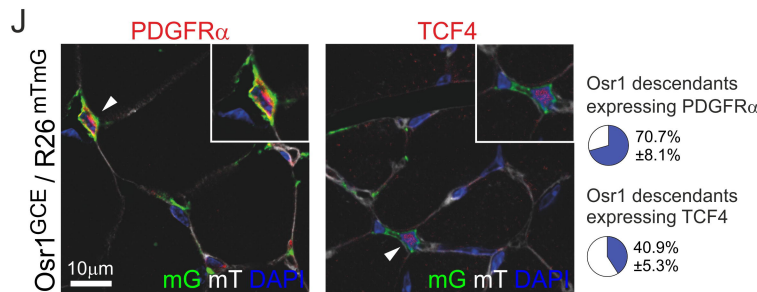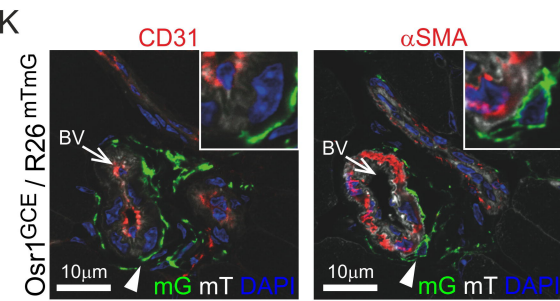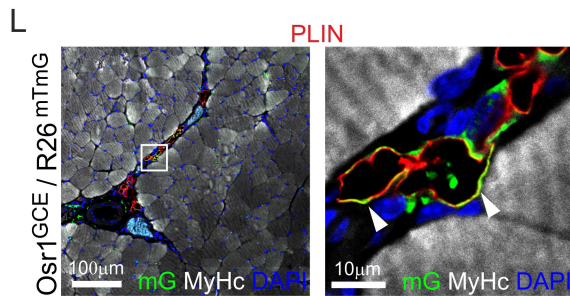

Source: https://www.biorxiv.org/content/10.1101/249003v1.full.pdf
